# Supplementary material for: Multiple functionalization of SBA-15 mesoporous silica in one-pot: fabricating an aluminum-containing plugged composite for sustained heparin release
Source: Royal Society of Chemistry journal article supplement (doi:10.1039/c3tb20425a), 2013-01-01
Supplement: c3tb20425a.pdf [file c3tb20425a.pdf]

### Supporting information

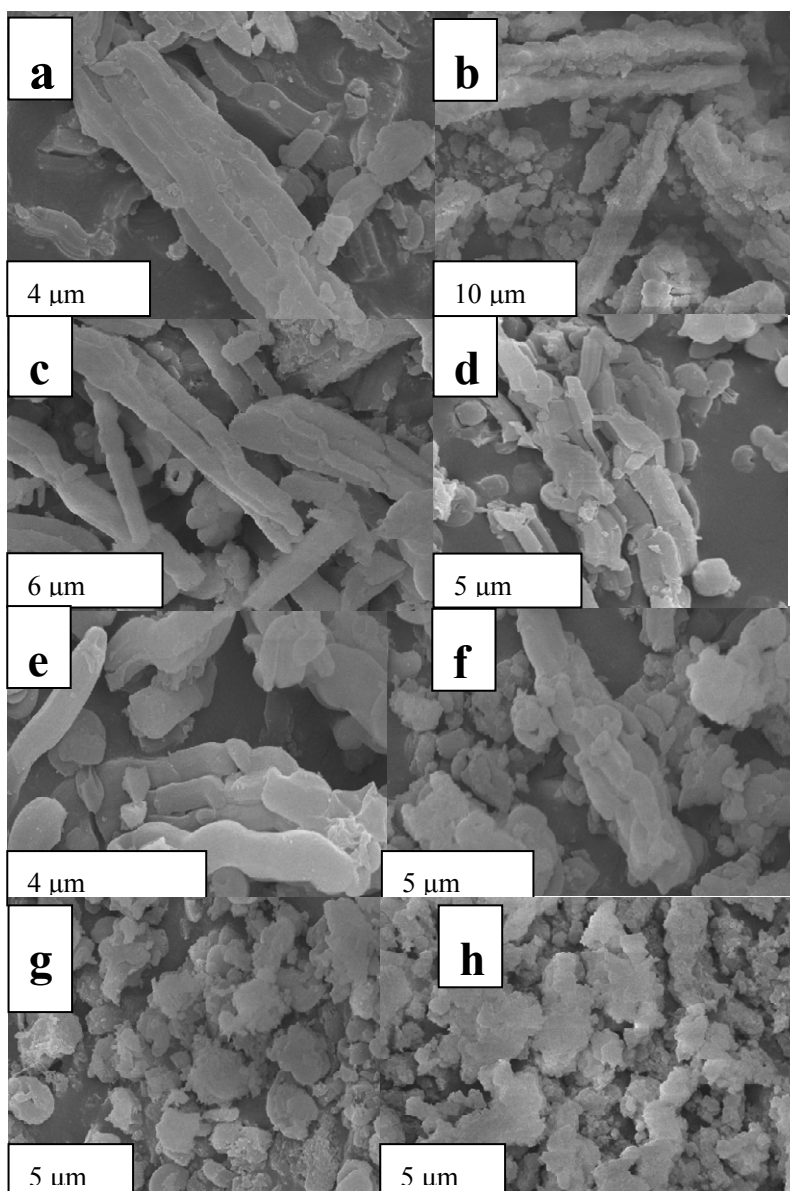

Figure S1. SEM images of the surfactant-free samples (a) SBA-15, (b) PS, (c) AS-100, (d) AS-75, (e) AS-60, (f) AS-45, (g) AS-30 and (h) AS-15.

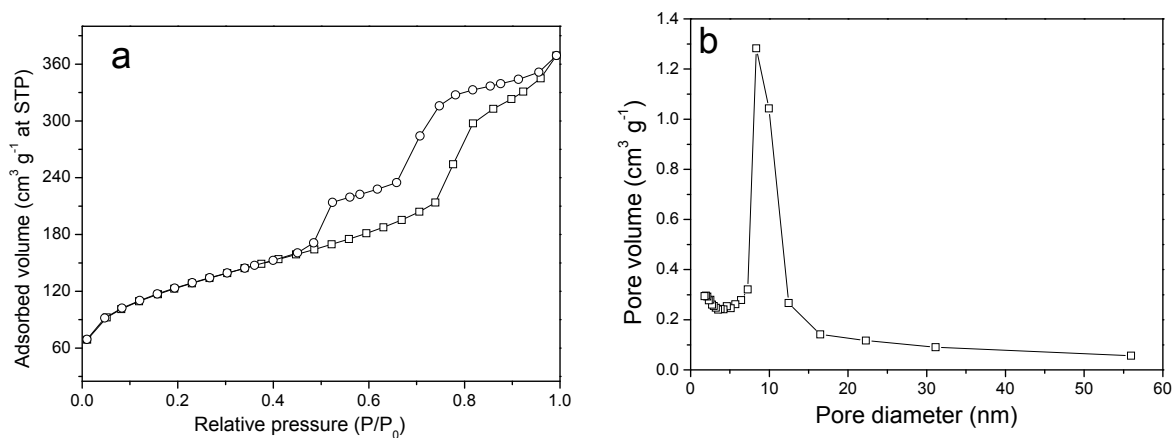

Figure S2. The nitrogen adsorption-desorption isotherms (a) and pore size distribution (b) of AS-30 with heparin in it.

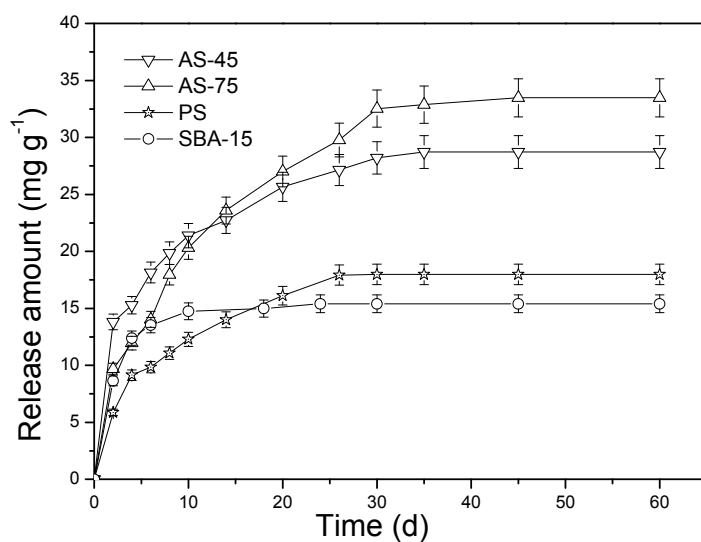

Figure S3. Adsorption isotherms of heparin at 277 K (a) and release profiles (b) from mesoporous materials

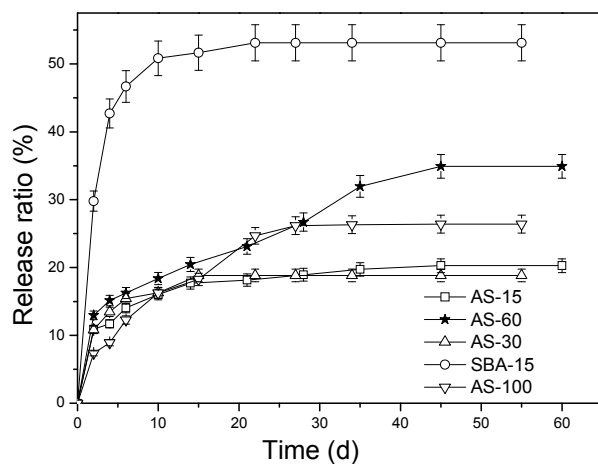

Figure S4. The heparin release ratios of SBA-15 series samples.
